# Supplementary material for: Exploring the luminescence properties and sensing mechanism of a turn-on TADF probe for sulfite
Source: Royal Society of Chemistry journal article supplement (doi:10.1039/d3cp00946g), 2023-01-01

# **Exploring the Luminescence Properties and Sensing Mechanism of a Turn-on TADF Probe for Sulfite**

Xiaofei Wang, Qun Zhang, Zhimin Wu, Xiaofang Li, Kai Zhang, Yuzhi Song, Jianzhong Fan, Lili Lin\*, Chuan-

Kui Wang\*, Zhongjie Wang\*

Shandong Key Laboratory of Medical Physics and Image Processing & Shandong  
Provincial Engineering and Technical Center of Light Manipulations, School of  
Physics and Electronics, Shandong Normal University, Jinan 250358, China

\*Author to whom correspondence should be addressed.

E-mail: [ckwang@sdu.edu.cn](mailto:ckwang@sdu.edu.cn), [linll@sdu.edu.cn](mailto:linll@sdu.edu.cn) and [wangzhongjie@sdu.edu.cn](mailto:wangzhongjie@sdu.edu.cn).

Table S1. The absorption properties for probe DCF-MPYM-lev and product DCF-MPYM calculated by several functionals.

| Function       | Molecule     | States | Energy(eV) | Wavelength(nm) | Oscillator(a.u.) |
|----------------|--------------|--------|------------|----------------|------------------|
| B3lyp          | DCF-MPYM-lev | $S_4$  | 3.11       | 399/370*       | 1.28             |
|                |              | $S_1$  | 2.22       | 558/525*       | 0.26             |
|                |              | $S_5$  | 2.87       | 433/480*       | 0.64             |
| M062x          | DCF-MPYM-lev | $S_2$  | 3.65       | 340            | 2.09             |
|                |              | $S_1$  | 2.80       | 443            | 0.73             |
|                |              | $S_4$  | 3.64       | 341            | 1.29             |
| $\omega b97xd$ | DCF-MPYM-lev | $S_2$  | 3.72       | 333            | 2.10             |
|                |              | $S_1$  | 2.89       | 429            | 0.80             |
|                |              | $S_4$  | 3.71       | 335            | 1.34             |
| Pbe0           | DCF-MPYM-lev | $S_2$  | 3.72       | 333            | 2.10             |
|                |              | $S_1$  | 2.89       | 429            | 0.80             |
|                |              | $S_5$  | 3.71       | 335            | 1.34             |

Table S2 Fluorescence properties, including the vertical excitation energies ( $E_{vt}/eV$ ), radiative rates ( $k_r/s^{-1}$ ), non-radiative decay rate ( $k_{nr}/s^{-1}$ ), total reorganization energies ( $\lambda/cm^{-1}$ ) and fluorescence efficiency ( $\Phi/\%$ ) of DCF-MPYM and  $[DCF - MPYM - 2H]^{2-}$  with different conformers are calculated.

|            | $E_{vt}$ | $k_r$              | $k_{nr}$              | $\lambda$ | $\Phi$ |
|------------|----------|--------------------|-----------------------|-----------|--------|
| DCF-MPYM-A | 1.54     | $3.57 \times 10^7$ | $2.23 \times 10^9$    | 3177      | 1.57%  |
| DCF-MPYM-B | 1.53     | $3.87 \times 10^7$ | $3.55 \times 10^9$    | 3190      | 1.08%  |
| DCF-MPYM-C | 1.54     | $2.93 \times 10^7$ | $2.03 \times 10^{11}$ | 4338      | 0.01%  |
| A          | 1.94     | $4.28 \times 10^7$ | $3.44 \times 10^8$    | 936       | 11.04% |
| B          | 2.01     | $8.31 \times 10^7$ | $2.99 \times 10^8$    | 906       | 21.73% |
| C          | 1.90     | $452 \times 10^7$  | $3.56 \times 10^8$    | 1369      | 11.25% |

Table S3 One-photon absorption properties including the excitation energy  $E_{opa}$  (eV), the corresponding wavelengths  $\lambda_{opa}$  (nm), the oscillator strengths  $\delta_{opa}$  (a.u.) and transition nature of  $DCF - MPYM - lev$  and  $DCF - MPYM$ .

| Mol           | Excited state | $E_{opa}$ | $\lambda_{opa}$ | $\delta_{opa}$ | Transition nature |
|---------------|---------------|-----------|-----------------|----------------|-------------------|
| DCF-MPYM -lev | S4            | 3.11      | 399             | 1.28           | H-1-L+1           |
|               |               |           |                 |                | H-1-L             |
| DCF-MPYM      | S4            | 2.71      | 457             | 0.30           | H-2-L             |
|               | S5            | 2.87      | 433             | 0.64           | H-L+2             |

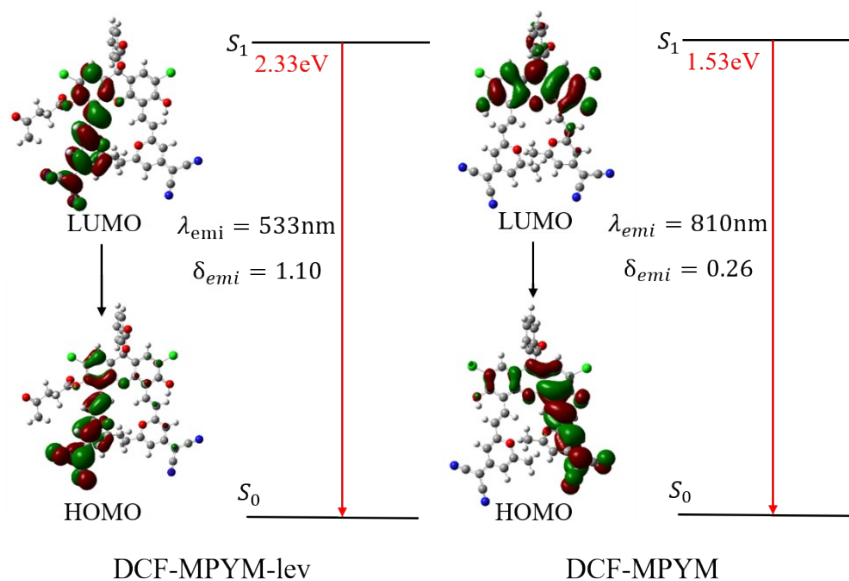

Figure S1. The emission properties of probe *DCF – MPYM – lev* and *DCF – MPYM*. The green and red sections represent the positive and negative phases of the wave function respectively.

Table S4. Fluorescence properties, including the vertical excitation energies ( $E_{vt}/eV$ ), radiative rates ( $k_r/s^{-1}$ ), non-radiative decay rate ( $k_{nr}/s^{-1}$ ), total reorganization energies ( $\lambda/cm^{-1}$ ) and fluorescence efficiency ( $\Phi/\%$ ) are calculated of *DCF – MPYM – lev* and *DCF – MPYM* with different conformers are calculated.

| Mol            | $E_{vt}$ | $k_r$              | $k_{nr}$           | $\lambda$ | $\Phi$ |
|----------------|----------|--------------------|--------------------|-----------|--------|
| DCF-MPYM-lev-B | 2.33     | $3.22 \times 10^8$ | $7.22 \times 10^7$ | 2851      | 81.7%  |
| DCF-MPYM-B     | 1.53     | $3.87 \times 10^7$ | $3.55 \times 10^9$ | 3190      | 1.08%  |

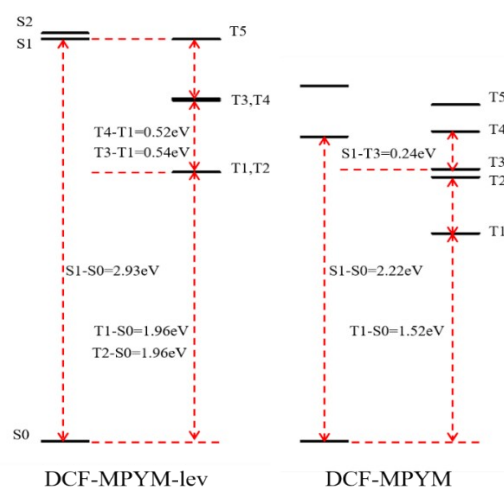

Figure S2. Excitation energies for *DCF – MPYM – lev* and *DCF – MPYM*.

Table S5. Frontier energies (eV) of HOMO-3 to LUMO+3 for  $[DCF - MPYM - lev - H]^-$  and  $[DCF - MPYM - 2H]^{2-}$  with different conformers in acetonitrile.

|       | HOMO-3 | HOMO-2 | HOMO-1 | HOMO  | LUMO  | LUMO+1 | LUMO+2 | LUMO+3 |
|-------|--------|--------|--------|-------|-------|--------|--------|--------|
| lev-A | -6.14  | -5.98  | -5.73  | -4.94 | -2.67 | -2.22  | -1.54  | -1.43  |
| lev-B | -6.13  | -5.99  | -5.70  | -4.97 | -2.70 | -2.19  | -1.57  | -1.44  |
| lev-C | -6.11  | -5.99  | -5.70  | -4.92 | -2.67 | -2.19  | -1.52  | -1.43  |
| A     | -5.82  | -5.55  | -5.32  | -4.96 | -2.30 | -2.24  | -1.95  | -1.17  |
| B     | -5.82  | -5.54  | -5.32  | -4.98 | -2.28 | -2.24  | -1.96  | -1.14  |
| C     | -5.81  | -5.53  | -5.27  | -4.95 | -2.33 | -2.21  | -1.94  | -1.20  |

Figure S3. The orbitals distribution form HOMO-3 to LUMO+3 of probe *DCF - MPYM - lev* and *DCF - MPYM*.

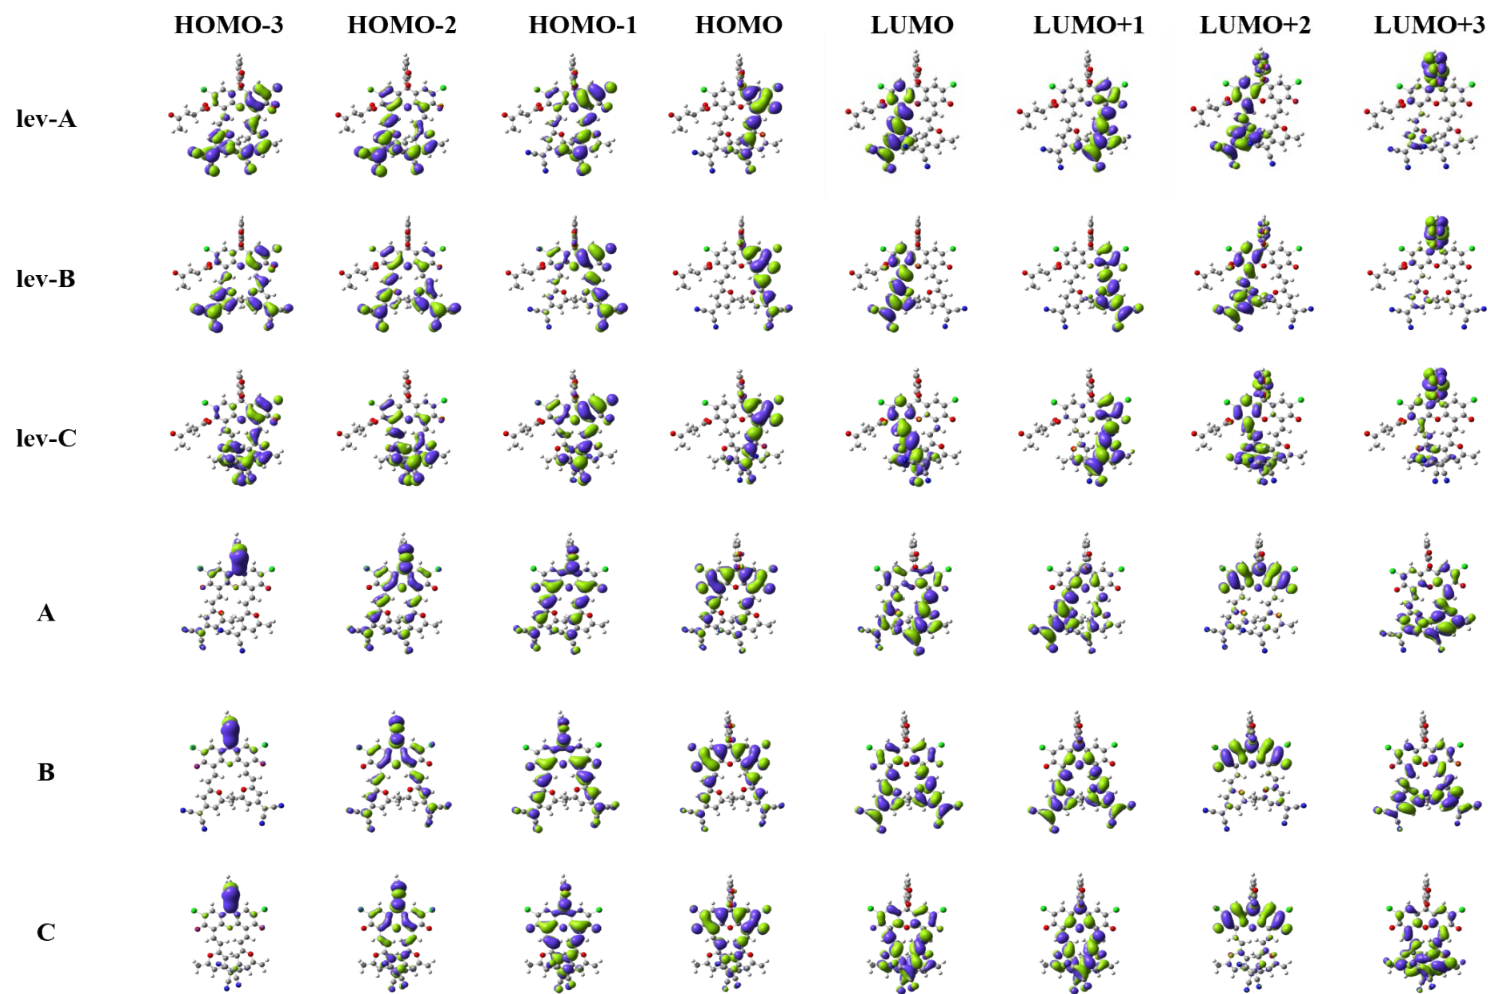

Supplement: d3cp00946g1.pdf [file d3cp00946g1.pdf]
